# Supplementary material for: Formation of nanocrystalline manganese oxide in flames: oxide phase governed by classical nucleation and size-dependent equilibria
Source: Royal Society of Chemistry journal article supplement (doi:10.1039/d0ce00734j), 2020-01-01
Supplement: d0ce00734j1.pdf [file d0ce00734j1.pdf]

**supplementary material for:**

**Formation of nanocrystalline manganese oxide in flames: oxide phase governed by classical nucleation and size-dependent equilibria**

Shruthi Dasappa, Joaquin Camacho

*Mechanical Engineering Department, San Diego State University, San Diego, California 92182, USA*

**Corresponding Author:**

Joaquin Camacho

Mechanical Engineering Department

5500 Campanile Dr. E323

San Diego, CA 92182

Phone: 619-594-6076

Fax: 619-594-3599

Email: [jcamacho@sdsu.edu](mailto:jcamacho@sdsu.edu)

Submitted to *CrystEngComm*

**Contents**

Table S1 Detailed flame conditions studied

Figure S1 Comparison of measured flame position between MMT doped flames and base flames without doping for B5-B8

Figure S2 XRD patterns after baseline correction for A series deposited materials.

Figure S3 Computed axial temperature profile (OPPDIF) with increasing global strain rate for Flame A.

Figure S4 Saturation ratio-reaction time profiles for  $S_0 - S_3$  in the A series flame with saturation ratios calculated with a +/- 100 K temperature-time history.

Figure S5 Saturation ratio-reaction time profile for MnO condensation in A flame for no conversion and 99% conversion

**Table S.1** Detailed flame conditions studied

| Flame | $\Phi$ | $X_{C_2H_4}$ | $X_{O_2}$ | $X_{Ar}$ | $T_{f,max}$ (K) | $T_{ad}$ (K) | $t_p(L_{plate})$ (ms) | $v_o$ (cm/s) | Global strain ( $s^{-1}$ ) | MMT (ppm) |
|-------|--------|--------------|-----------|----------|-----------------|--------------|-----------------------|--------------|----------------------------|-----------|
| A1    | 0.4    | 0.063        | 0.477     | 0.460    | 2600            | 2586         | 4                     | 335          | 132                        | 200       |
| A2    | 0.4    | 0.063        | 0.477     | 0.460    | 2600            | 2586         | 4                     | 335          | 132                        | 300       |
| A3    | 0.4    | 0.063        | 0.477     | 0.460    | 2600            | 2586         | 4                     | 335          | 132                        | 500       |
| B1    | 0.4    | 0.056        | 0.423     | 0.520    | 2510            | 2509         | 4                     | 301          | 119                        | 100       |
| B2    | 0.4    | 0.063        | 0.477     | 0.460    | 2600            | 2586         | 4                     | 335          | 132                        | 100       |
| B3    | 0.4    | 0.056        | 0.423     | 0.520    | 2510            | 2509         | 4                     | 301          | 119                        | 200       |
| B4    | 0.4    | 0.063        | 0.477     | 0.460    | 2600            | 2586         | 4                     | 335          | 132                        | 200       |
| B5    | 0.4    | 0.045        | 0.335     | 0.620    | 2340            | 2333         | 7                     | 252          | 99                         | 500       |
| B6    | 0.4    | 0.051        | 0.384     | 0.560    | 2450            | 2439         | 6                     | 290          | 114                        | 500       |
| B7    | 0.4    | 0.056        | 0.423     | 0.520    | 2510            | 2509         | 4                     | 301          | 119                        | 500       |
| B8    | 0.4    | 0.063        | 0.477     | 0.460    | 2600            | 2586         | 4                     | 335          | 132                        | 500       |
| C1    | 0.4    | 0.063        | 0.477     | 0.460    | 2600            | 2586         | 4                     | 335          | 132                        | 100       |
| C2    | 0.5    | 0.056        | 0.336     | 0.610    | 2560            | 2549         | 5                     | 299          | 118                        | 100       |
| C3    | 0.6    | 0.055        | 0.277     | 0.670    | 2590            | 2560         | 5                     | 305          | 120                        | 100       |
| C4    | 0.8    | 0.060        | 0.225     | 0.720    | 2620            | 2631         | 5                     | 316          | 124                        | 100       |
| D1    | 1.2    | 0.054        | 0.135     | 0.810    | 2390            | 2425         | 7                     | 267          | 105                        | 200       |
| D2    | 1.3    | 0.064        | 0.149     | 0.790    | 2480            | 2491         | 6                     | 279          | 110                        | 200       |
| D3    | 1.4    | 0.067        | 0.144     | 0.790    | 2400            | 2410         | 7                     | 269          | 106                        | 200       |
| D4    | 1.5    | 0.074        | 0.149     | 0.780    | 2390            | 2395         | 6                     | 279          | 110                        | 200       |

Note: Maximum flame temperature,  $T_{f,max}$ , is based on the computed axial temperature profile from OPPDIF using measured  $T(L=0) = 400$  K and  $T(L=L_{plate}=2.54 \text{ cm}) = 473$  K as boundary conditions. The adiabatic flame temperature,  $T_{ad}$ , is for the unburned mixture at  $T = 400$  K. The global strain rate ( $v_o / L_{plate}$ ) is based on the inlet cold gas velocity,  $v_o$ .

$\Phi = 0.40, T_{f,max} = 2340 \text{ K}, t = 7 \text{ ms}$

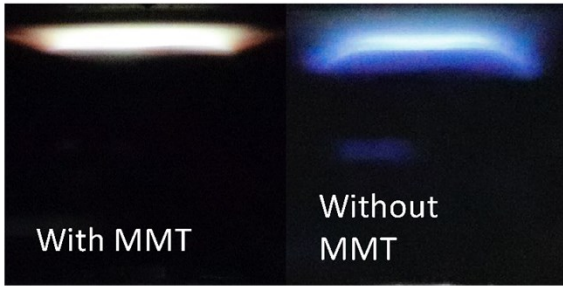

$\Phi = 0.40, T_{f,max} = 2450 \text{ K}, t = 6 \text{ ms}$

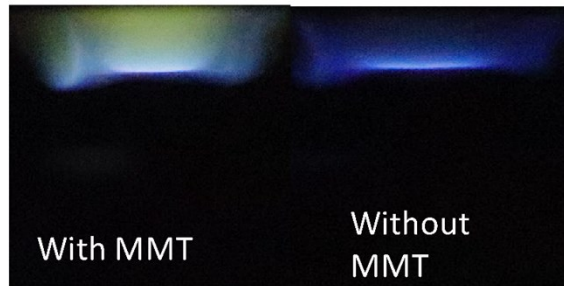

$\Phi = 0.40, T_{f,max} = 2510 \text{ K}, t = 4 \text{ ms}$

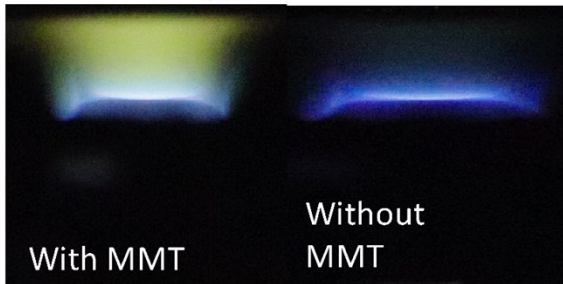

$\Phi = 0.40, T_{f,max} = 2600 \text{ K}, t = 4 \text{ ms}$

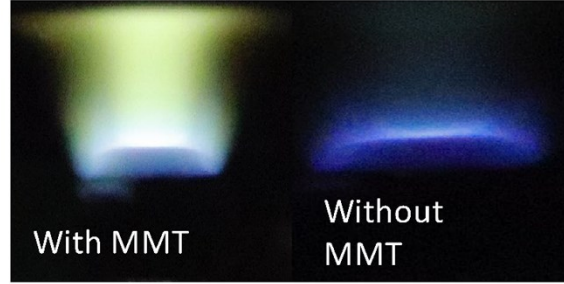

**Figure S.1** Comparison of measured flame position between MMT doped flames and base flames without doping for B5-B8.

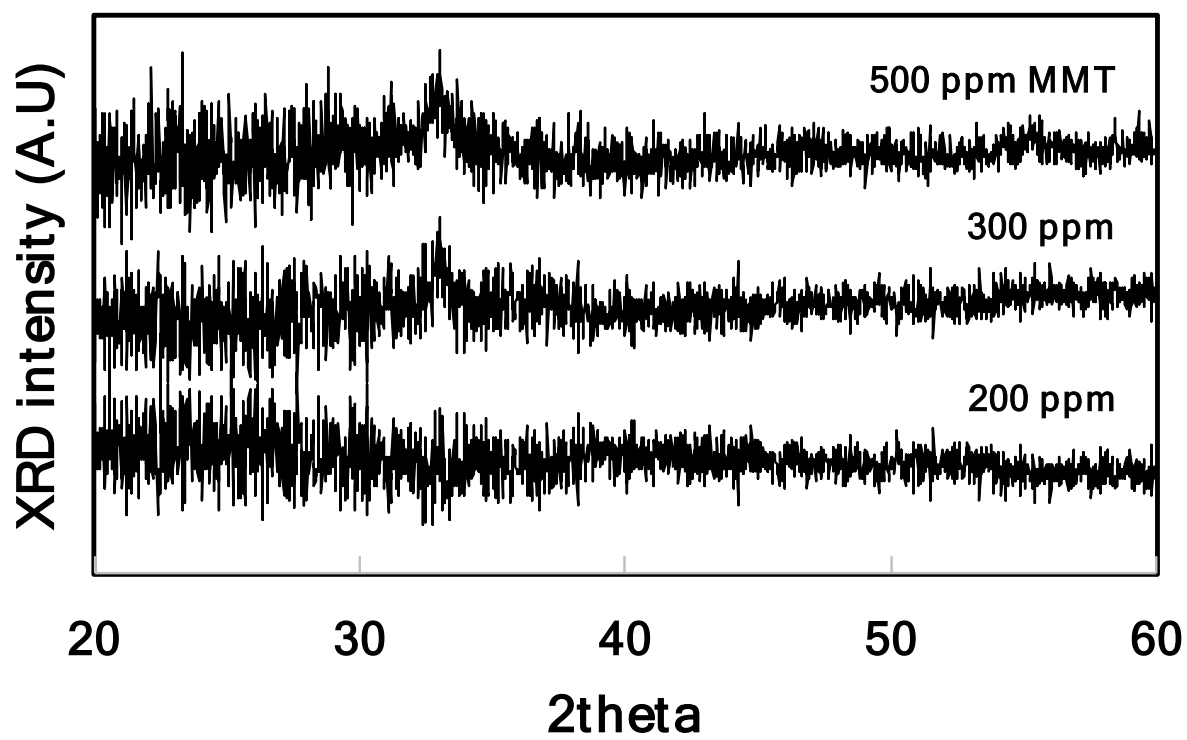

Figure S.2 XRD patterns after baseline correction for A series deposited materials.

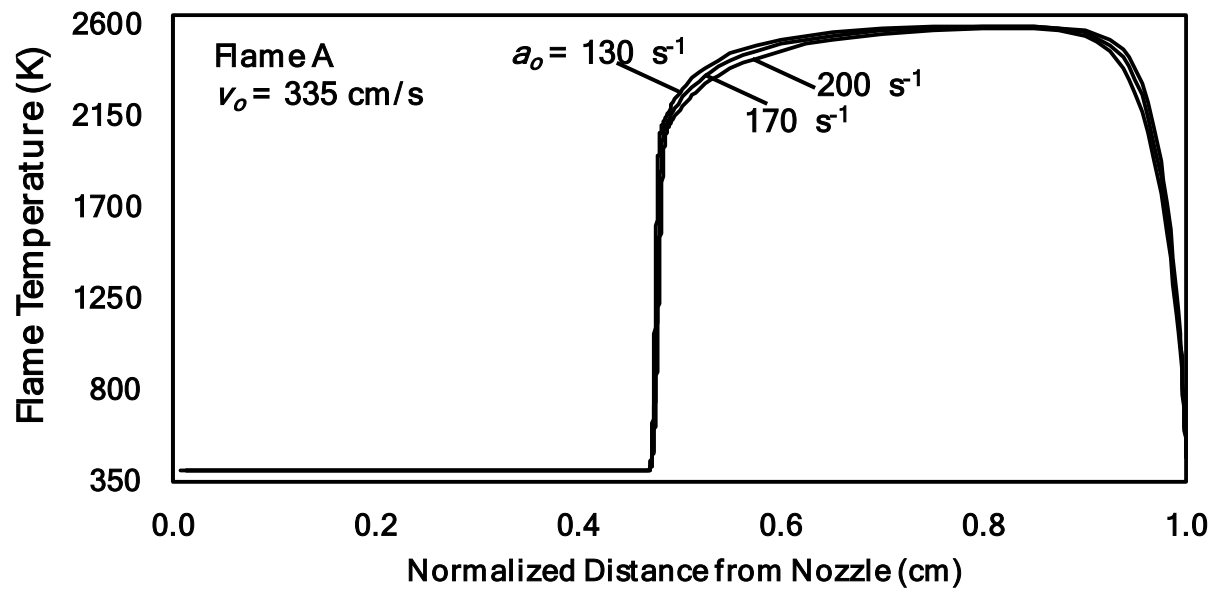

Figure S3 Computed axial temperature profile (OPPDIF) with increasing global strain rate for Flame A.

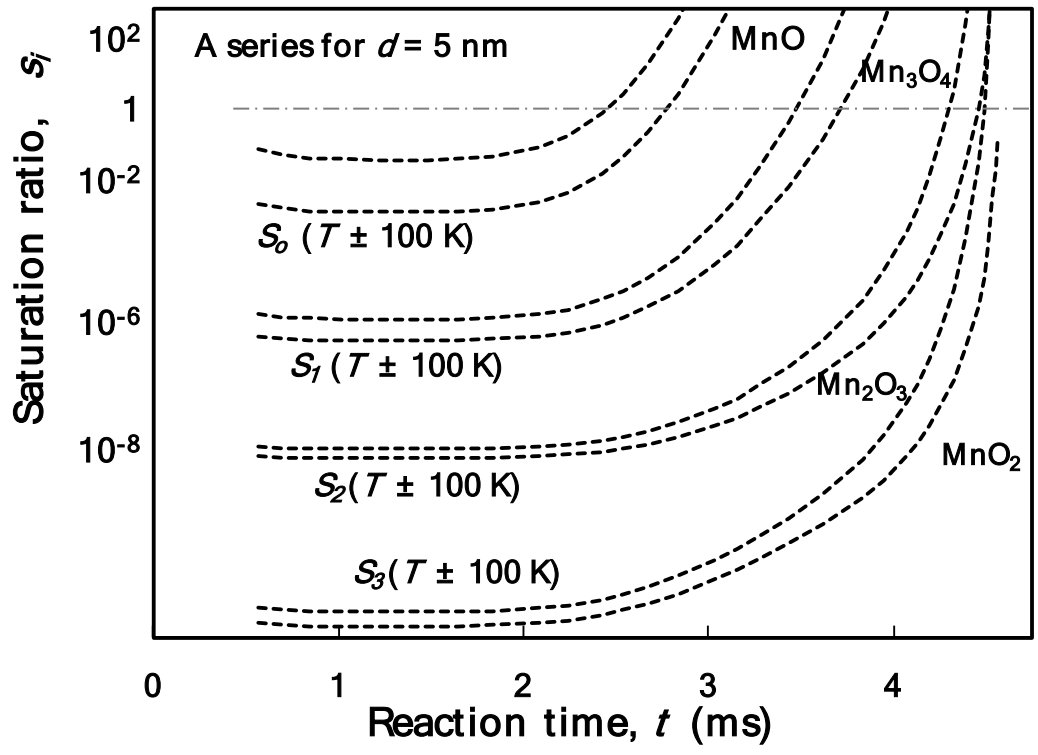

**Figure S.4** Saturation ratio-reaction time profiles for  $S_0 - S_3$  in the A series flame with saturation ratios calculated with a temperature-time history  $\pm 100$  K the base calculation.

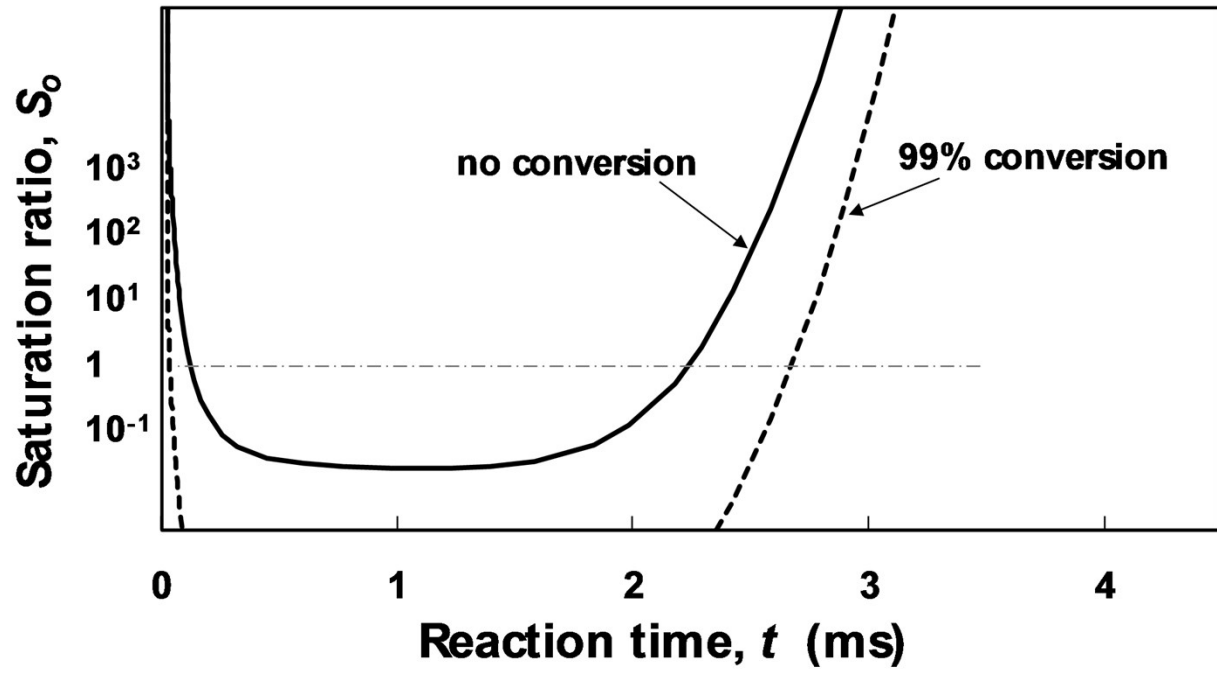

Figure S.5 Saturation ratio-reaction time profile for MnO condensation in A flame for no conversion and 99% conversion
